# Supplementary material for: Ahead, a Novel Validated Machine Learning Model for Clinical Diagnosis of Alcohol Associated Hepatitis
Source: Research Square preprint supplement (doi:10.21203/rs.3.rs-8960896/v1), 2026-05-26
Supplement: Supplementary file 1 [file 01baf0f8afe273ddc83285f9.docx]

**
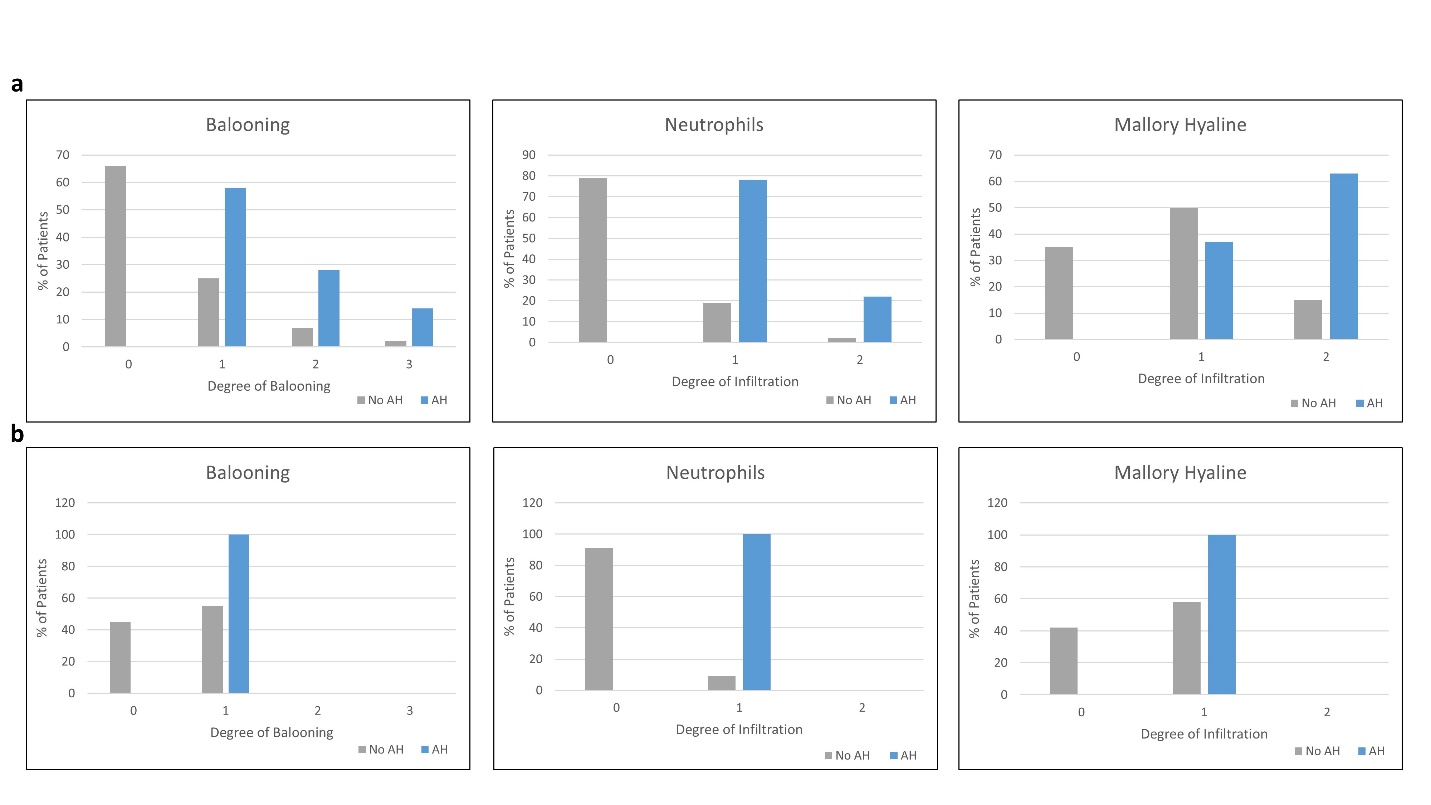
**

**Supplementary Fig. 1** Percentage of subjects with hepatocyte ballooning, Mallory Hyaline, and neutrophilic infiltration stratified for presence or absence of alcohol-associated hepatitis (AH) in the training and testing cohorts.
